# Supplementary material for: Enhanced photocatalytic water splitting with two-dimensional van der Waals heterostructures of BAs/WTeSe
Source: Royal Society of Chemistry journal article supplement (doi:10.1039/d3ma01065a), 2024-01-01
Supplement: d3ma01065a1.pdf [file d3ma01065a1.pdf]

# **Supporting Information of “Enhanced Photocatalytic Water Splitting with Two-Dimensional van der Waals Heterostructures of BAs/WTeSe”**

Hanifan BiBi<sup>1</sup>, Abdul Jalil, Syed Zafar Illyas<sup>1</sup>, Azeem Ghulam Nabi<sup>2,3,\*</sup>, Devis Di Tommaso<sup>3,4,\*</sup>

## **AFFILIATIONS**

<sup>1</sup> Department of Physics, Allama Iqbal Open University, Islamabad, 44000, Pakistan

<sup>2</sup> Department of Physics, Hafiz Hayat Campus, University of Gujrat, Gujrat, 50700, Pakistan

<sup>3</sup> Department of Chemistry, School of Physical and Chemical Sciences, Mile End Road, London, Queen Mary University of London, E1 4NS, UK

<sup>4</sup> Digital Environment Research Institute, Queen Mary University of London, Empire House, 67-75 New Road, London, E1 1HH, UK

---

## Table of Contents

|                                                                           |    |
|---------------------------------------------------------------------------|----|
| <b>Phonon spectra calculations</b> .....                                  | 3  |
| <b>Ab initio molecular dynamics simulations</b> .....                     | 4  |
| <b>Band structure calculations</b> .....                                  | 9  |
| <b>Photocatalytic water splitting: values of the effective mass</b> ..... | 10 |
| <b>Calculations of carrier mobilities</b> .....                           | 11 |
| <b>References</b> .....                                                   | 12 |

## Phonon spectra calculations

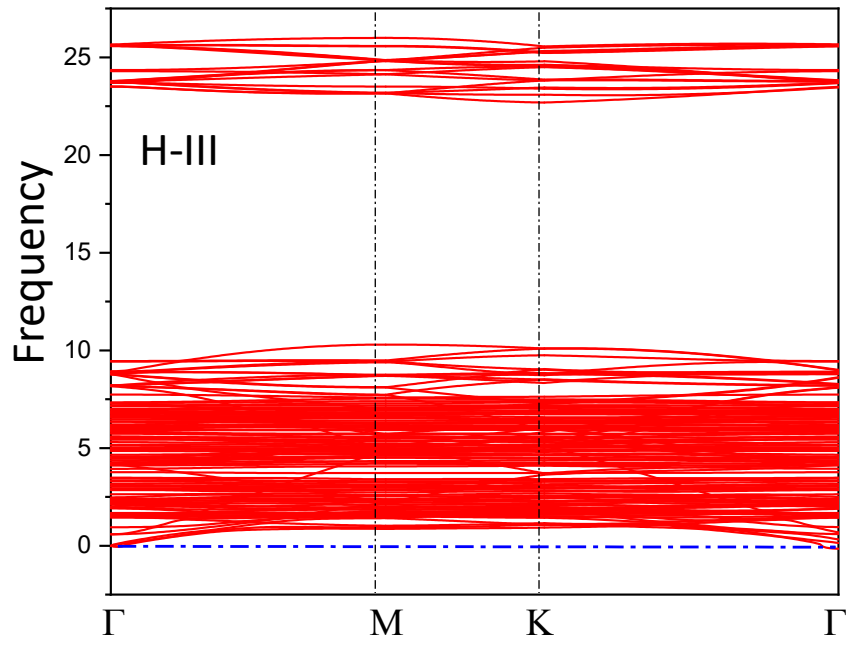

Figure S1. Phonon spectra of the H-III heterostructure.

## Ab initio molecular dynamics simulations

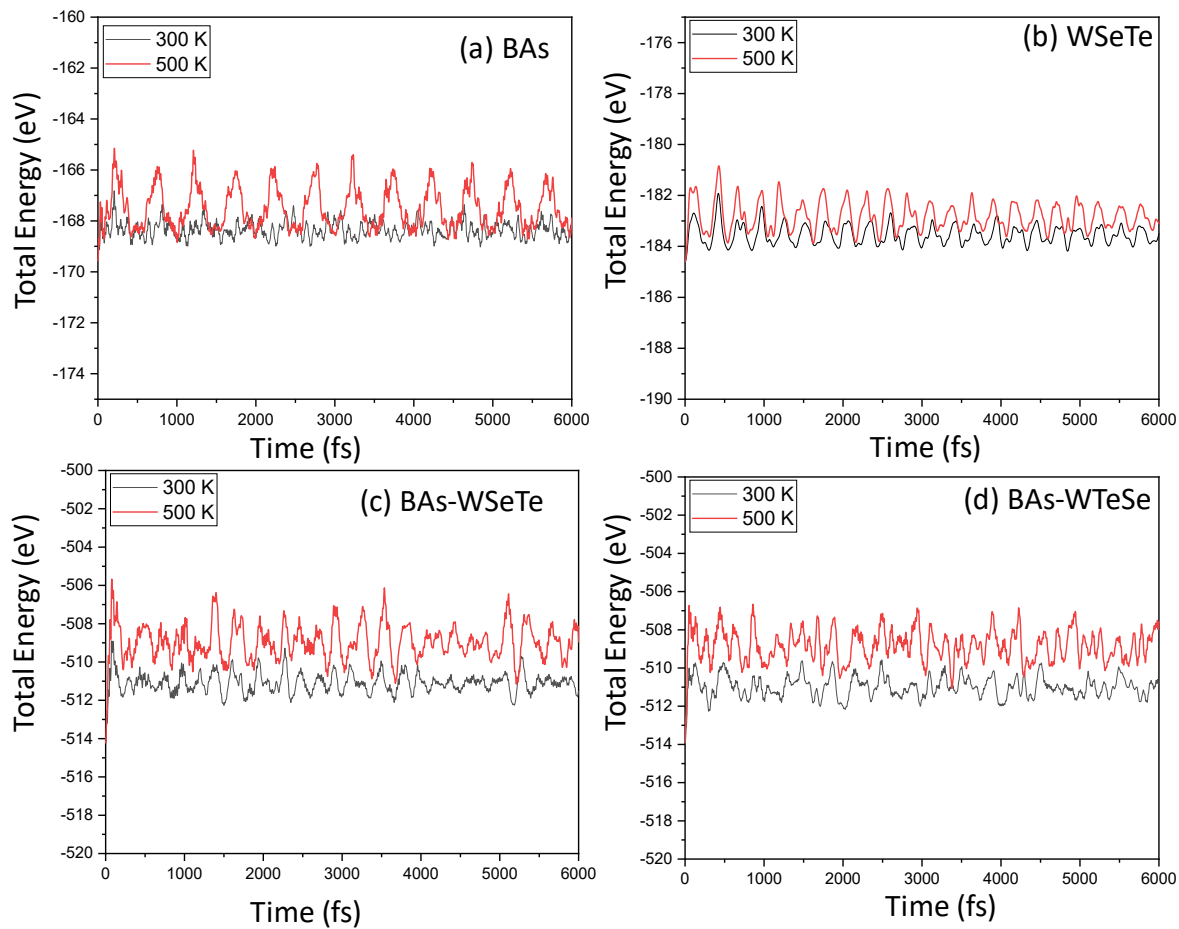

**Figure S2.** Variation of the total energy of (a) BAs, (b) WSeTe, and (c) BAs-WSeTe and (d) BAs-WTeSe during ab initio molecular dynamics simulations at 300 K and 500 K.

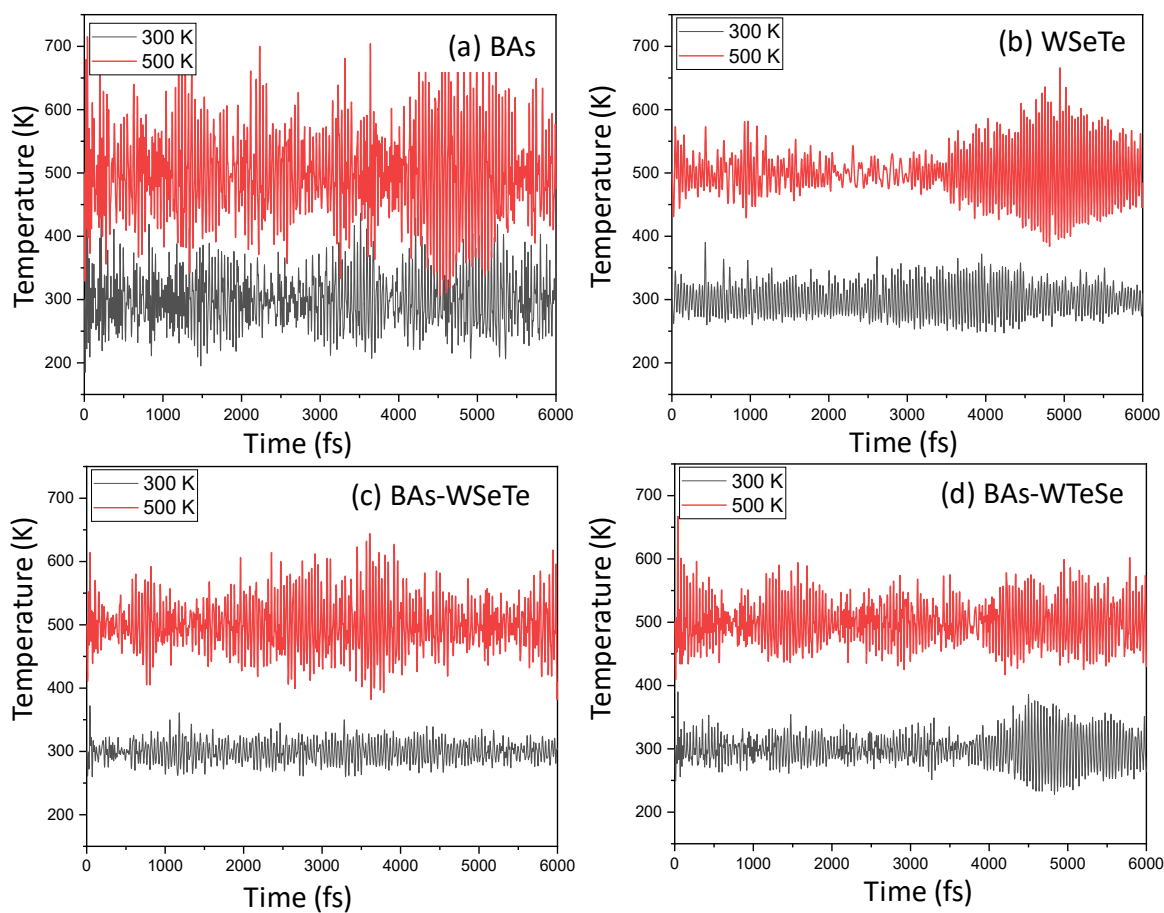

**Figure S2A.** At 300 K and 500K, the temperature of (a) BAs, (b) WSeTe, and (c) BAs-WSeTe and (d) BAs-WTeSe during the 6 ps ab initio molecular dynamics simulations.

BAs

(a) AIMD at 300K

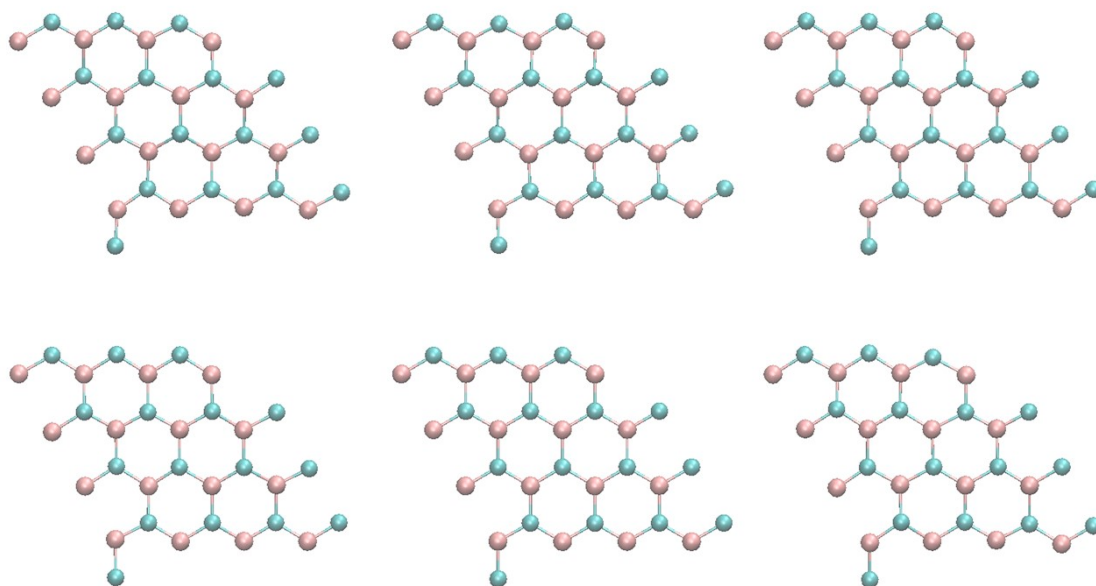

(b) AIMD at 500K

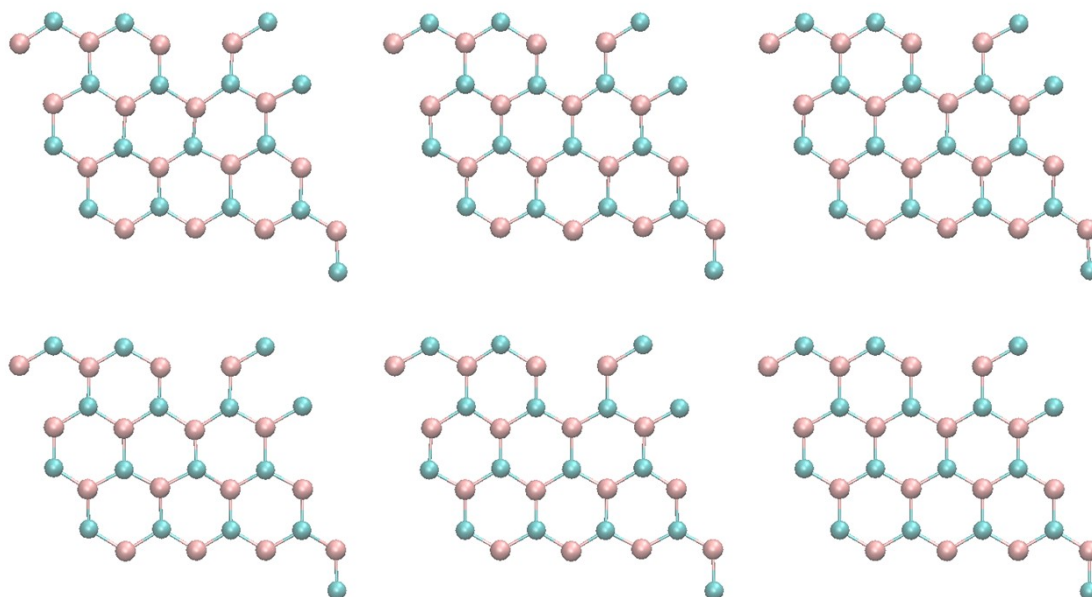

**Figure S3.** Representative structures of BAs during ab initio molecular dynamics simulations at **(a)**  $T = 300\text{K}$  and **(b)**  $T = 500\text{K}$ .

WSeTe or WTeSe

(a) AIMD at 300K

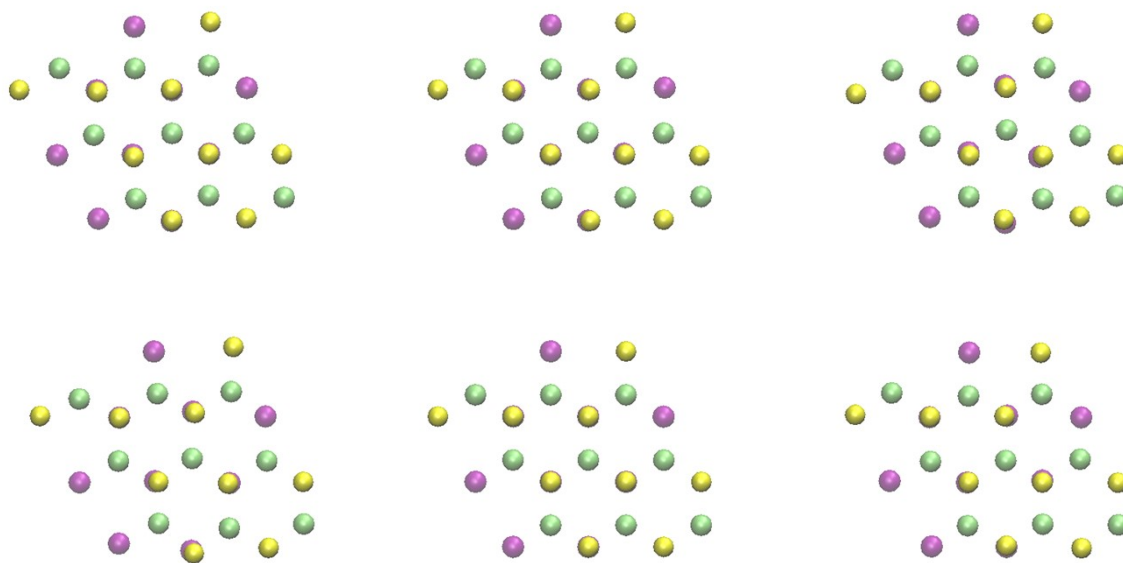

(b) AIMD at 500K

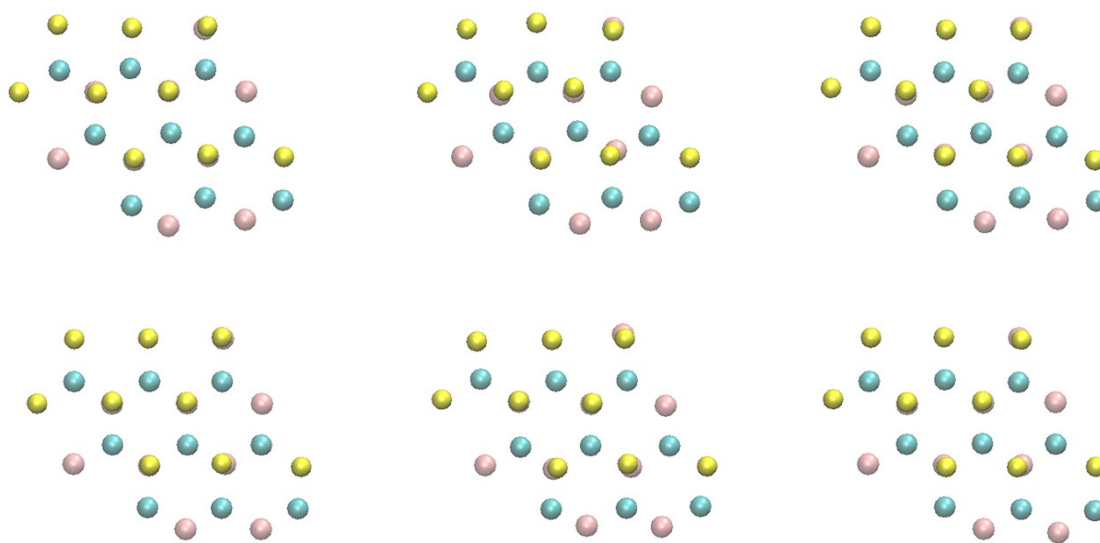

**Figure S4.** Representative structures of WSeTe during ab initio molecular dynamics simulations at (a)  $T = 300\text{K}$  and (b)  $T = 500\text{K}$ .

BAs-WSeTe

(a) AIMD at 300K

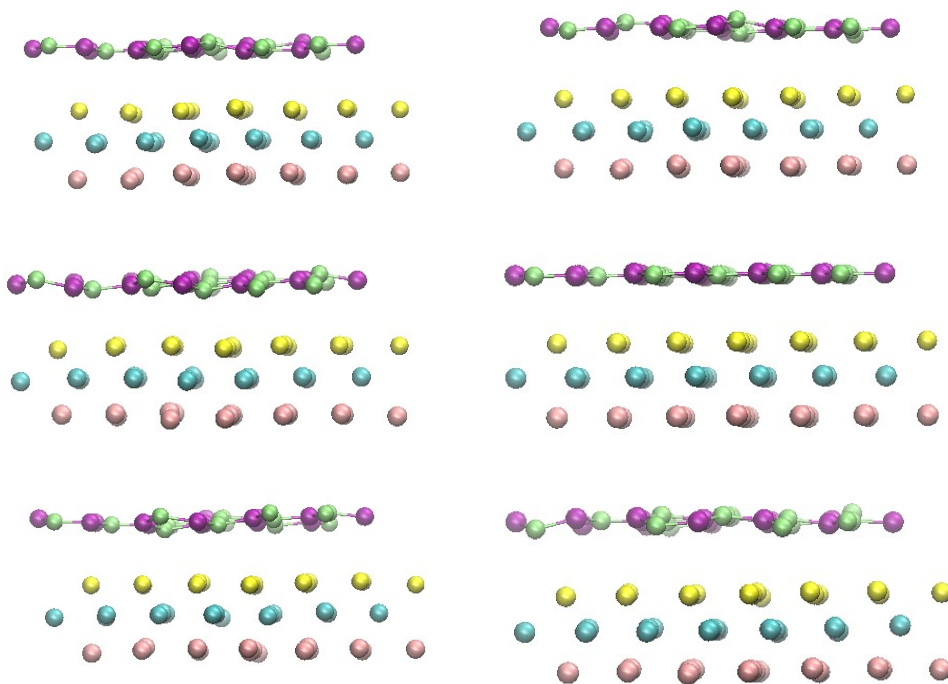

(b) AIMD at 500K

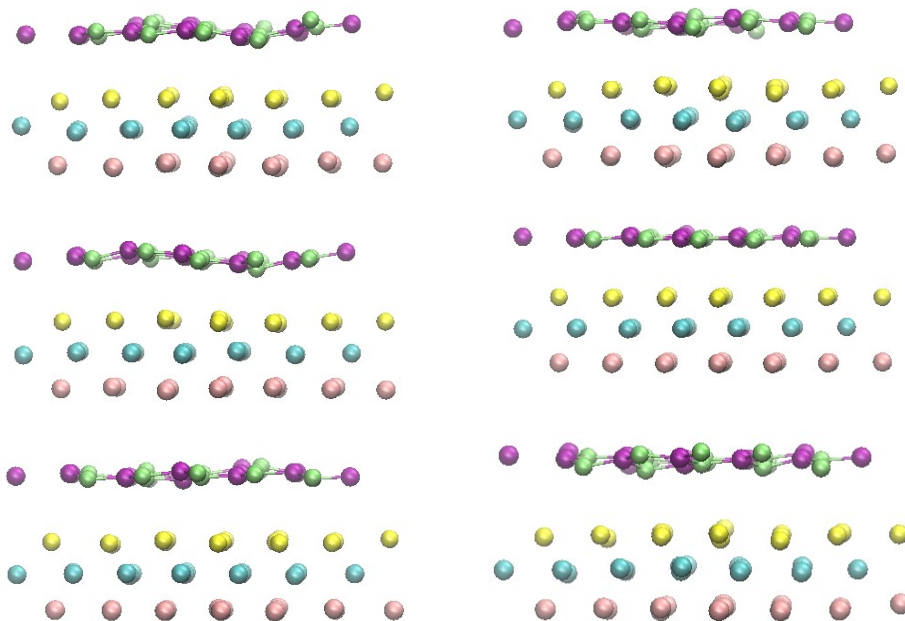

**Figure S5.** Representative structures of the BAs-WSeTe heterostructure during ab initio molecular dynamics simulations at **(a)**  $T = 300\text{K}$  and **(b)**  $T = 500\text{K}$ .



BAs-WTeSe

(a) AIMD at 300K

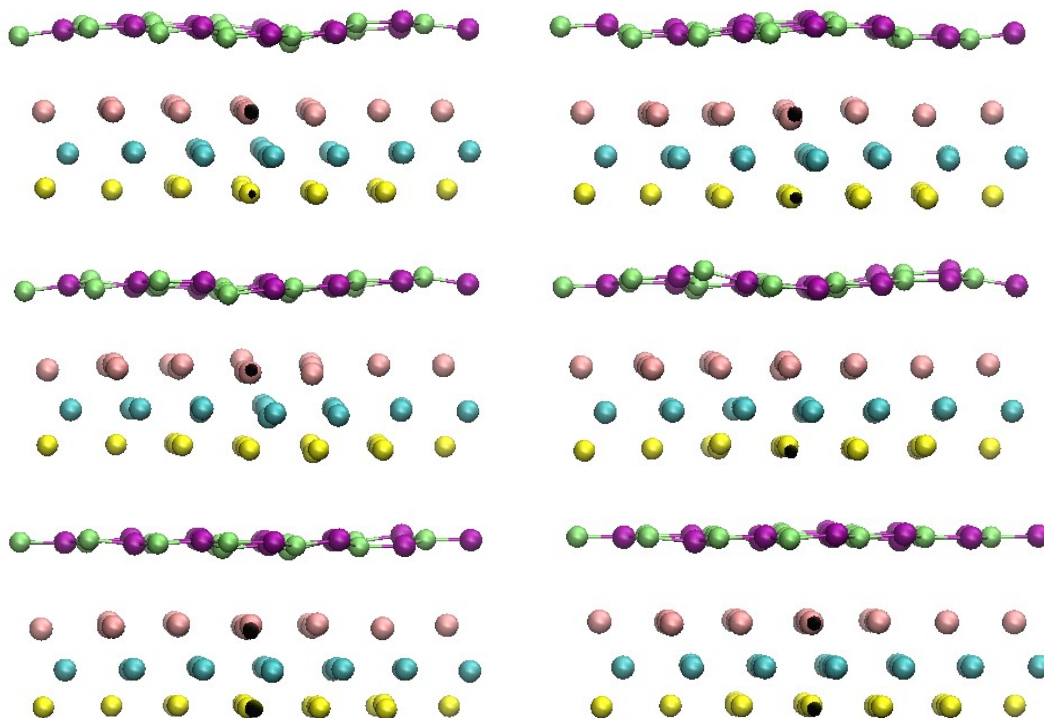

(b) AIMD at 500K

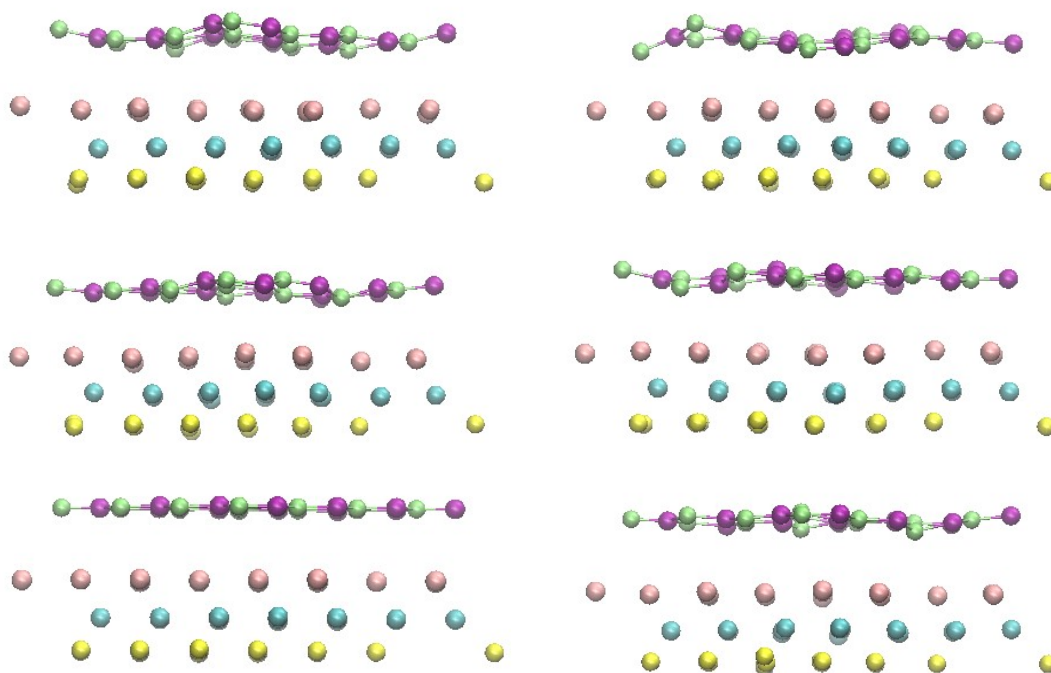

**Figure S6.** Representative structures of the BAs-WTeSe heterostructure during ab initio molecular dynamics simulations at **(a)**  $T = 300\text{K}$  and **(b)**  $T = 500\text{K}$ .

## Band structure calculations

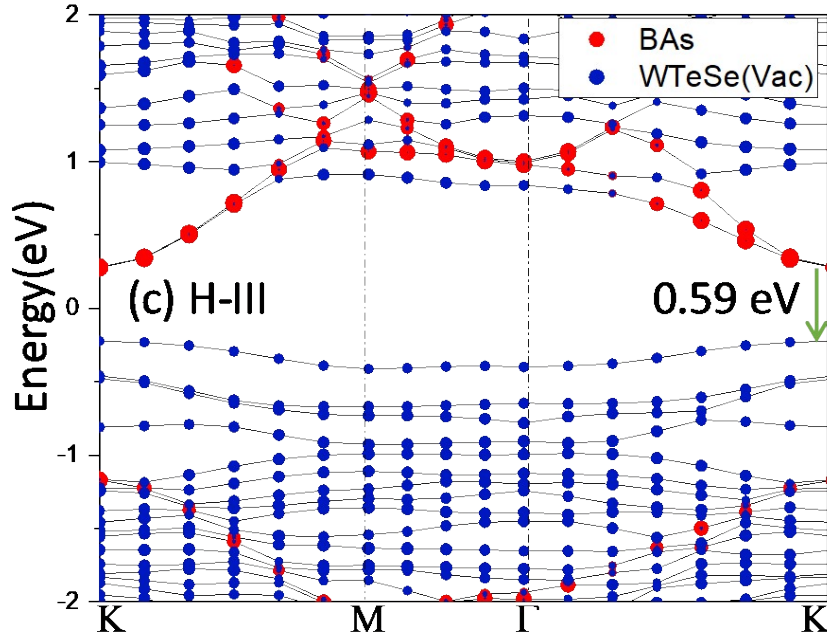

Figure S7. Band structure of the H-III heterostructure.

## Photocatalytic water splitting: values of the effective mass

**Table S1.** Calculated effective mass ( $m^*$ ) for electrons and holes in the Armchair  $x$  and zigzag  $y$  directions (T = 300 K).

|       | Direction |          | $m^* (m_0)$ | $D = m^*_h/m^*_e$ |
|-------|-----------|----------|-------------|-------------------|
| BAs   | x         | Electron | 0.173       | 0.994             |
|       |           | hole     | -0.172      |                   |
|       | y         | Electron | 0.256       | 0.922             |
|       |           | hole     | -0.236      |                   |
| WSeTe | x         | Electron | 0.390       | 1.371             |
|       |           | hole     | -0.535      |                   |
|       | y         | Electron | 0.433       | 1.559             |
|       |           | hole     | -0.675      |                   |
| H-I   | x         | Electron | 0.184       | 2.021             |
|       |           | hole     | -0.372      |                   |
|       | y         | Electron | 0.255       | 1.756             |
|       |           | hole     | -0.448      |                   |
| H-II  | x         | Electron | 0.192       | 1.875             |
|       |           | hole     | -0.360      |                   |
|       | y         | Electron | 0.277       | 1.798             |
|       |           | hole     | -0.498      |                   |
| H-III | x         | Electron | 0.271       | 0.78              |
|       |           | hole     | 0.213       |                   |
|       | y         | Electron | 0.265       | 2.19              |
|       |           | hole     | 0.582       |                   |
| H-IV  | x         | Electron | 0.271       | 9.11              |
|       |           | hole     | 2.480       |                   |
|       | y         | Electron | 0.213       | 7.55              |
|       |           | hole     | 1.610       |                   |

# Calculations of carrier mobilities

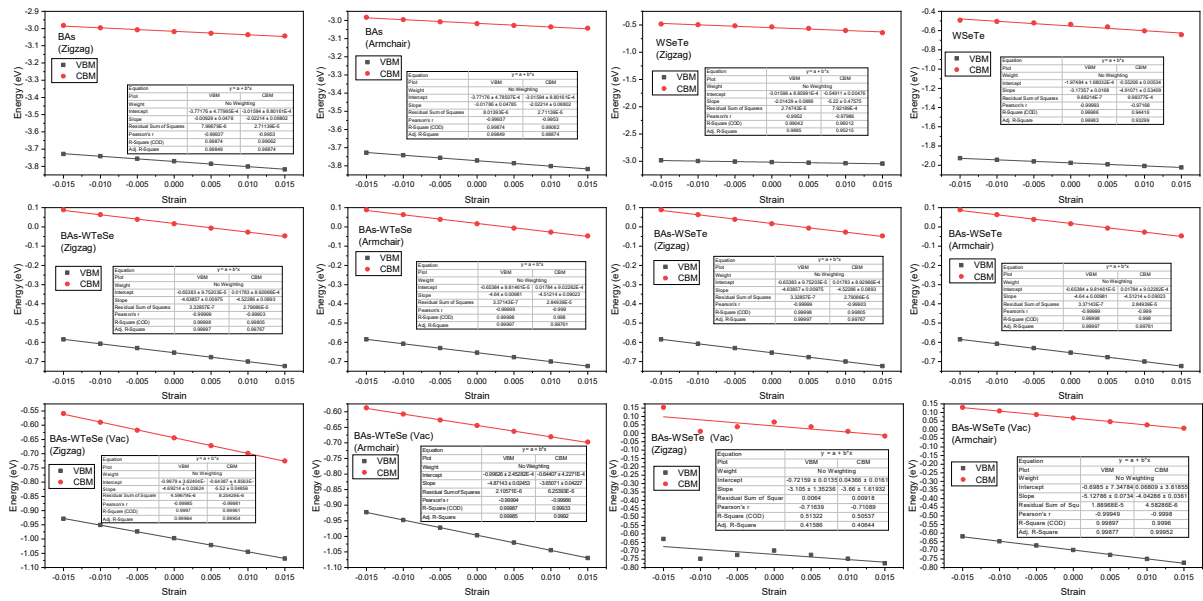

**Figure S8.** The energy shift of BAS monolayer, WXYsheet, and BAS-Janus WXY(X=Se, Te) obtained from DFT-PBE calculations. Graphs generated using VASPKIT [1].

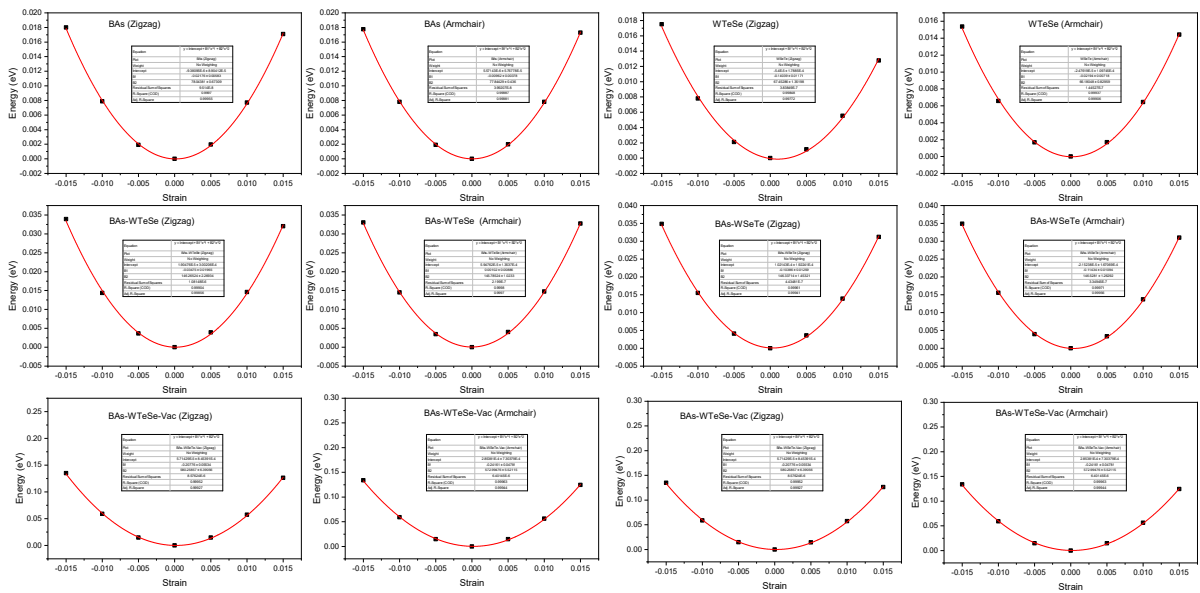

**Figure S9.** The band edge positions of BAS monolayer, WXY sheet, and BAS-Janus WXY (X=Se, Te) heterostructure as a function of the uniaxial strain obtained from DFT-PBE functional.

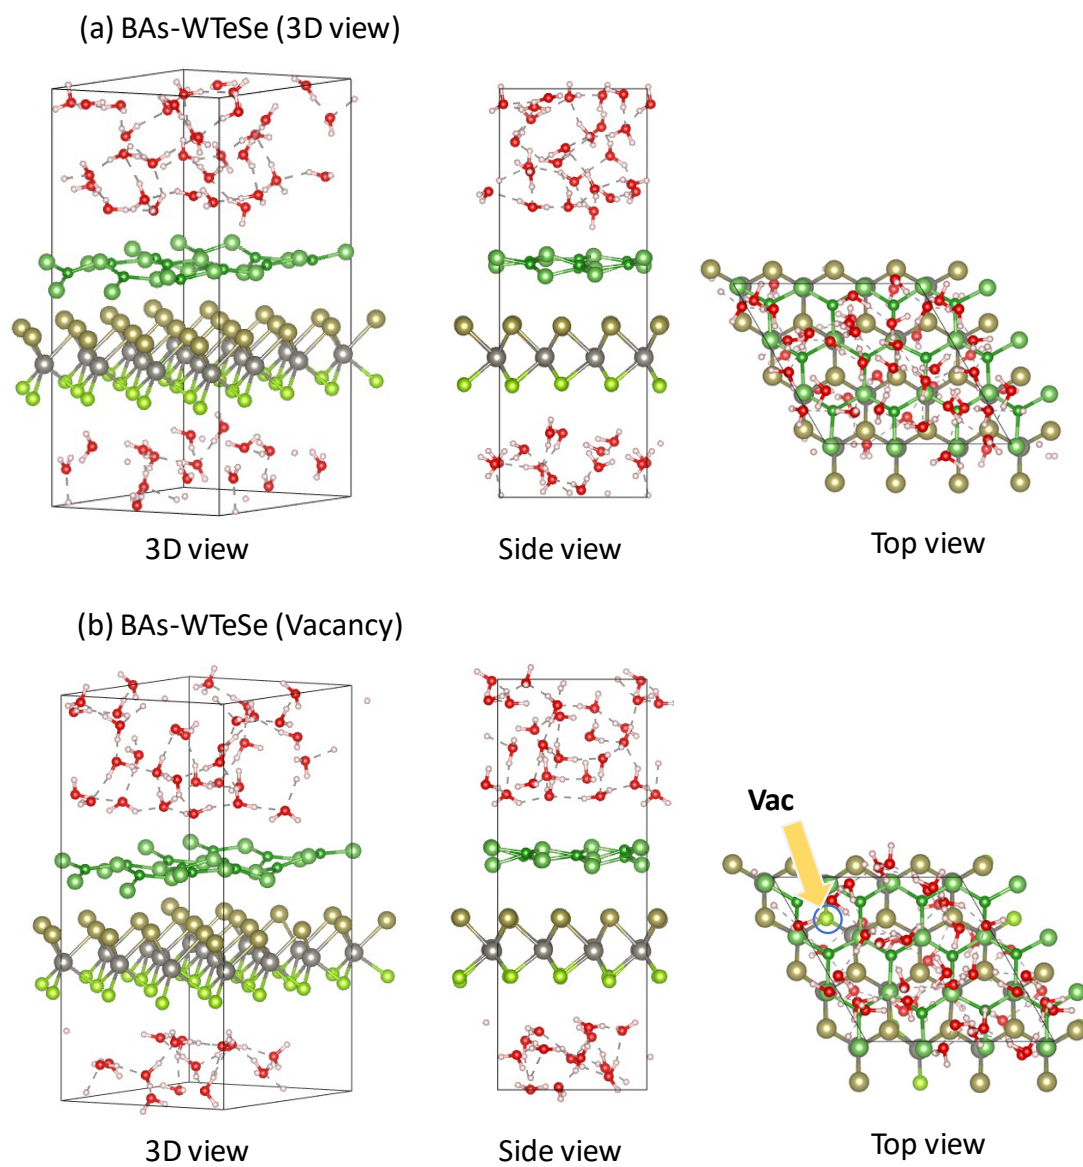

**Figure S10.** Atomistic model of the heterostructure in contact with water: **(a)** BAs-WTeSe; **(b)** BAs-WTeSe with Te vacancy.

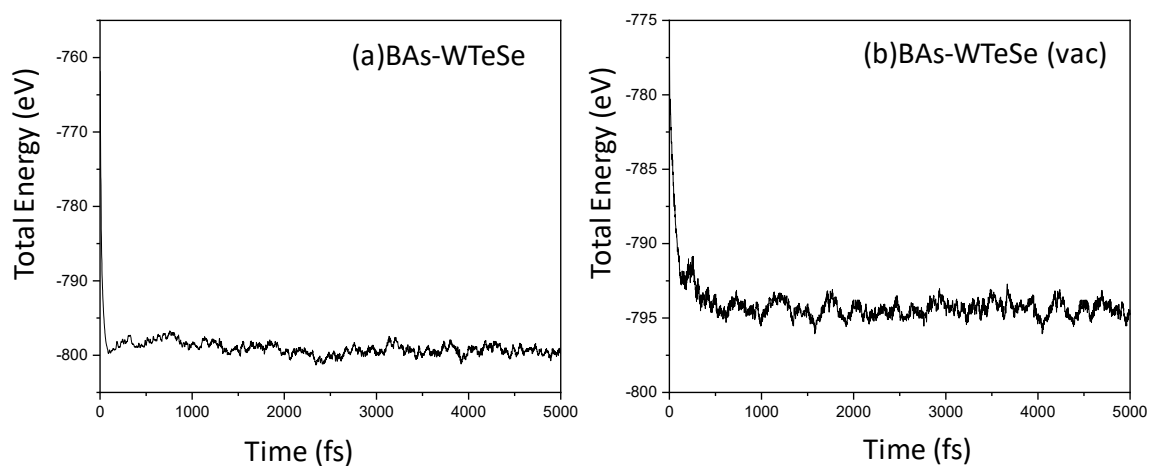

**Figure S11.** ab initio molecular dynamics simulations for (a) BAS-WTeSe (b) BAS-WTeSe (Vac) at  $T = 300\text{K}$

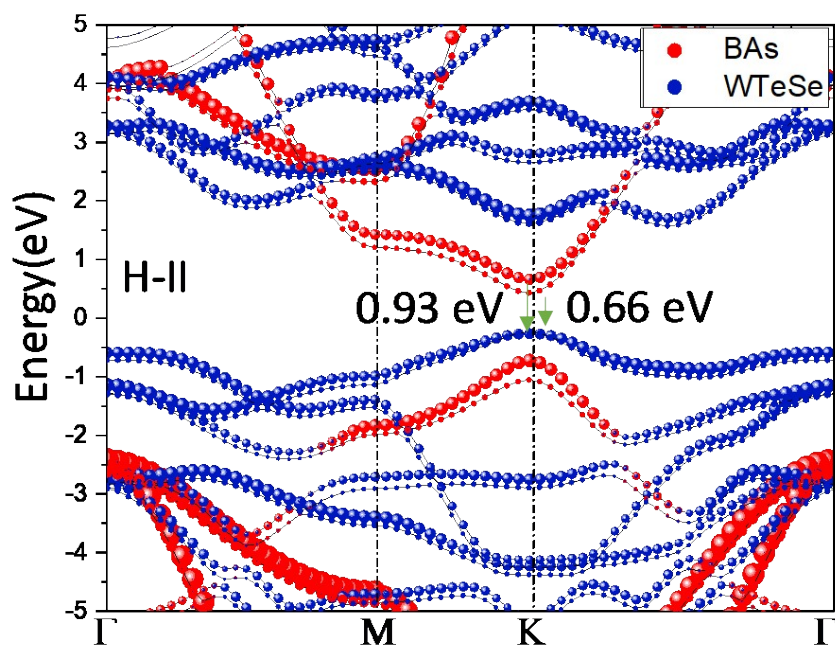

**Figure S12 :** The band structures with large bubbles for the most stable and small solid circles for the second most stable configuration of WTeSe.

## References

- [1] V. Wang, N. Xu, J.C. Liu, G. Tang, W.T. Geng, VASPKIT: A User-Friendly Interface Facilitating High-Throughput Computing and Analysis Using VASP Code, *Computer Physics Communications* 267, 108033 (2021). <https://doi.org/10.1016/j.cpc.2021.108033>
